# Supplementary material
Source: publisher figshare collection journal article supplement (https://sage.figshare.com/ndownloader/files/13724627)
Supplement: Supplementary file 1 [file 13724627]

Table 4. Characteristics of Included Studies

| Citation, Year, Country              | Design/Method                                 | Sample Information                                                                         |
|--------------------------------------|-----------------------------------------------|--------------------------------------------------------------------------------------------|
| Allen et al., 2011, Australia        | Qualitative; semi-structured interviews       | Healthy cohort of participants (n=24) in actual biobank                                    |
| Barr, 2006, England                  | Qualitative; semi-structured interviews       | Female patients (n=43) who donated to actual biobank                                       |
| Beskow et al., 2016, U.S.            | National online survey; randomized experiment | Hypothetical decision-makers (n=1916)                                                      |
| Beskow et al., 2008, U.S.            | Qualitative; cognitive interviews             | Hypothetical decision-makers (n=40)                                                        |
| Bickmore et al., 2009, U.S.          | Randomized experiment using BICEP             | Hypothetical decision-makers (n=29)                                                        |
| Busby, 2004, England                 | Qualitative/ interviews                       | Donors (n=27) to an actual genetic research project                                        |
| Cervo et al., 2013, Italy            | Descriptive; self- administered questionnaire | Patients (n=430) enrolled in actual biobank studies                                        |
| Dixon-Woods et al., 2007,<br>England | Qualitative; semi-structured interviews       | Healthy volunteers (n=29) in an actual genetic study                                       |
| Ducournau et al., 2009,<br>France    | Qualitative; observation & interviews         | Men (n=60) offered a check-up & asked to participate in actual biobank                     |
| Hoeyer, 2003,<br>Sweden              | Qualitative; observation & interviews         | Donors and refusers (n=29) recruited as participants in actual program offering check -ups |
| Joseph et al., 2008, U.S.            | Survey; verbally administered, in-person      | Female donors and refusers (n=93) to an actual biobank                                     |

| Citation, Year, Country               | Design/Method                                                                  | Sample Information                                                                                                                              |
|---------------------------------------|--------------------------------------------------------------------------------|-------------------------------------------------------------------------------------------------------------------------------------------------|
| Klima et al., 2014, U.S.              | Survey; mailed, self- administered QuIC                                        | Parents (n=252) who actually enrolled their children to participate in congenital cardiovascular malformation research that included biobanking |
| Mahnke et al., 2014, U.S.             | Proof of concept study testing hypothetical computer-based consent             | Community members (n=9) representative of potential biobank participants                                                                        |
| Mancini et al., 2011, France          | Mailed, self-administered, 12- page questionnaire                              | Patients (n=574) treated for cancer and actually asked to donate tumor samples for research                                                     |
| Marshall et al., 2006, Nigeria & U.S. | Qualitative & Quantitative; survey & interviews                                | Clinic patients and controls (n=655) actually enrolled in genetic hypertension study in Nigeria & U.S.                                          |
| Marshall et al., 2014, Nigeria        | Qualitative & Quantitative; survey & interviews                                | Female cases and controls (n=215) enrolled in an actual genetic epidemiological study on breast cancer                                          |
| Matsui et al., 2012, Japan            | Intervention study; add-on cluster, randomized controlled trial                | Patients (n=336) actually consenting to genetic cohort study                                                                                    |
| Matsui et al., 2007, Japan            | Descriptive study of intervention using a 2- question, in-person questionnaire | Patients (n=2192) being asked to participate in actual genetic cohort study                                                                     |

| Citation, Year, Country                         | Design/Method                                                                                     | Sample Information                                                                       |
|-------------------------------------------------|---------------------------------------------------------------------------------------------------|------------------------------------------------------------------------------------------|
| McCarty et al., 2015, U.S.                      | Randomized controlled trial; mailed, self-administered QuIC                                       | Men with prostate cancer (n=71) willing to enroll in actual biobank                      |
| McCarty et al., 2008, U.S.                      | Qualitative; focus group (Focus Group Series 3)                                                   | Potentially eligible biobank subjects (n=21)                                             |
| McCarty et al., 2007, U.S.                      | Mailed, self-administered QuIC                                                                    | Random sample of actual biobank participants (n=924)                                     |
| McCaughey et al., 2016, Australia               | Retrospective survey: mailed/ e-mailed, 35-item questionnaire with 14 questions re: understanding | Patients and controls (n=141) who actually donated a biospecimen for ophthalmic research |
| McGraw et al., 2012, U.S.                       | Qualitative; cognitive interviews evaluating written versus video informed consent                | Patients and community members (n=43) making hypothetical biobanking decision            |
| Merz & Sankar, 1998, U.S.                       | Descriptive survey                                                                                | Prospective jurors (n=99) making hypothetical decision                                   |
| Moutel et al., 2001, France                     | Self-administered questionnaire                                                                   | Patients (n=51) enrolled in actual biobanking study                                      |
| Ormond et al., 2009, U.S.                       | Qualitative & Quantitative; interviews & QuIC                                                     | Actual biobank participants (n=200)                                                      |
| Panoyan et al., 2008, U.S.                      | Survey; self-administered questionnaire                                                           | Participants (n=151) in actual genetic study                                             |
| Petersen et al., 2014<br>Belgium, Germany, & UK | Self-administered questionnaire                                                                   | Female breast cancer patients in Belgium (n=152), Germany (n=122), and UK (n=122)        |
| Rahm et al., 2013, U.S.                         | Self-administered questionnaire                                                                   | Donors and refusers (n=203) to hypothetical biobank                                      |

| Citation, Year, Country       | Design/Method                                                                                  | Sample Information                                                                              |
|-------------------------------|------------------------------------------------------------------------------------------------|-------------------------------------------------------------------------------------------------|
| Robinson et al., 2013, U.S.   | Randomized trial; interview & questionnaire                                                    | Individuals (n=229) recruited into actual studies                                               |
| Roessler et al., 2015, U.S.   | 14 question quiz or semi-structured interview<br>(self-rated understanding only)               | Research volunteers and patients (n=480) being asked to enroll in actual biobank                |
| Shelton, et al., 2015, U.S.   | Intervention study; experimental post-test only;<br>in person, self-administered questionnaire | Visitors (n=134) in waiting rooms; hypothetical decision to donate biospecimen of family member |
| Simon et al., 2015, U.S.      | 2 x2 experimental design; prospective<br>randomized study /online survey, QuIC                 | Patients (n=200) approached for enrollment into an actual biobank                               |
| Toccaceli et al., 2009, Italy | Mailed, self-administered survey                                                               | Participants (n=99) recruited from a twin registry and radio ads for actual genetic study       |

BICEP=Brief Informed Consent Evaluation Protocol instrument; QuIC= Quality of Informed Consent instrument
